# Supplementary material for: Disentangling the structure, optical properties, and photoluminescence emissions of NiW1−xMoxO4 (x = 25, 50, and 75%) solid solutions: experimental and DFT studies
Source: Royal Society of Chemistry journal article supplement (doi:10.1039/d4tc05251j), 2025-01-01
Supplement: d4tc05251j1.pdf [file d4tc05251j1.pdf]

# Disentangling the Structure, Optical, and Photoluminescence Emissions of NiW<sub>1-x</sub>Mo<sub>x</sub>O<sub>4</sub> (x = 25, 50, and 75%) Solid Solutions: Experimental and DFT Study†

Amanda Fernandes Gouveia,<sup>\*a</sup> Marcelo Assis,<sup>a,b</sup> Lara Kelly Ribeiro,<sup>a,c</sup> Eduardo de Oliveira Gomes,<sup>a</sup> Marcio Daldin Teodoro,<sup>d</sup> Elson Longo,<sup>c</sup> and Juan Andrés<sup>\*a</sup>

<sup>a</sup>Department of Physical and Analytical Chemistry, University Jaume I, Castelló 12071, Spain.

<sup>b</sup>Department of Biosciences, Institute of Health and Society, Universidade Federal de São Paulo, Santos 11015-020, SP, Brazil,

<sup>c</sup>CDMF-UFSCar, Universidade Federal de São Carlos, São Carlos 13565-905, SP, Brazil.

<sup>d</sup>Physics Department, Federal University of São Carlos, São Carlos 13565-905, SP, Brazil.

\*Corresponding author: [gouveiad@uji.es](mailto:gouveiad@uji.es), [andres@qfa.uji.es](mailto:andres@qfa.uji.es)

## Supporting Information

### Elemental analysis – XRF spectrometry

**Table SI-1.** Elemental analysis of W and Mo atoms in the samples obtained by XRF spectrometry.

| Elements  | Nominal |      |      |      |       | Experimental |      |      |      |       |
|-----------|---------|------|------|------|-------|--------------|------|------|------|-------|
|           | NW      | NW75 | NW50 | NW25 | NM    | NW           | NW75 | NW50 | NW25 | NM    |
| <b>W</b>  | 100.0   | 75.0 | 50.0 | 25.0 | 0.0   | 100.0        | 77.6 | 47.5 | 22.6 | 0.0   |
| <b>Mo</b> | 0.0     | 25.0 | 50.0 | 75.0 | 100.0 | 0.0          | 22.4 | 52.5 | 77.4 | 100.0 |

### Bond distances and Jahn-Teller distortion

In **Figure SI-1**, the NW structure and its constituent [NiO<sub>6</sub>] and [WO<sub>6</sub>] clusters are illustrated, along with the substitution sites in the NW75, NW50, and NW25 solid solutions that lead to the formation of [MoO<sub>6</sub>] clusters. The bond distances and Jahn-Teller distortion ( $\sigma_{JT}$ ) values are reported in **Table SI-3**.

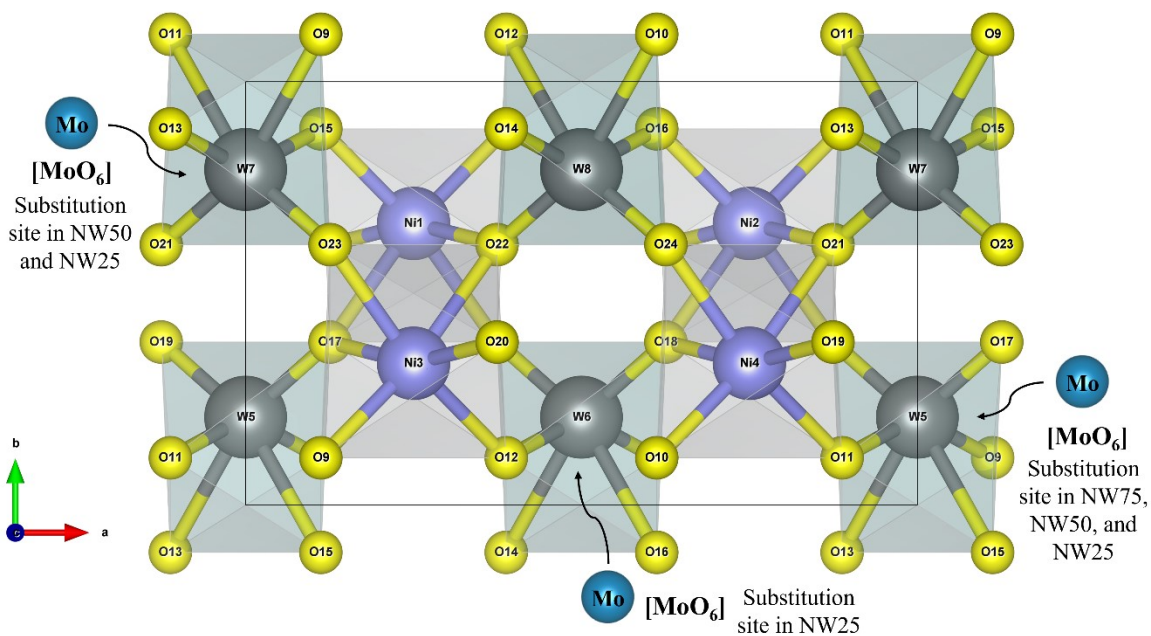

**Figure SI-1.** Schematic illustration of the NW structure, showing the [NiO<sub>6</sub>] and [WO<sub>6</sub>] clusters, and the substitution site where W is replaced by Mo in the solid solutions.

**Table SI-2.** Bond distances (Å) of Ni–O, W–O, and Mo–O in each cluster within the NW structure and the solid solutions.

| Bond                            | NW           | NW75         | NW50         | NW25         |
|---------------------------------|--------------|--------------|--------------|--------------|
| Ni1 – O14                       | 2.0089       | 2.0152       | 2.0143       | 2.0307       |
| Ni1 – O15                       | 2.0089       | 2.0255       | 2.0063       | 2.0138       |
| Ni1 – O22                       | 2.0402       | 2.042        | 2.0504       | 2.0528       |
| Ni1 – O23                       | 2.0402       | 2.0425       | 2.0187       | 2.0196       |
| Ni1 – O17                       | 2.1064       | 2.0811       | 2.0942       | 2.0862       |
| Ni1 – O20                       | 2.1064       | 2.0983       | 2.0908       | 2.0668       |
| <b><math>\sigma_{JT}</math></b> | <b>0.042</b> | <b>0.031</b> | <b>0.037</b> | <b>0.026</b> |
| Ni2 – O16                       | 2.0089       | 2.0154       | 2.0149       | 2.0318       |
| Ni2 – O13                       | 2.0089       | 2.0258       | 2.0069       | 2.0133       |
| Ni2 – O24                       | 2.0402       | 2.0418       | 2.0503       | 2.0533       |
| Ni2 – O21                       | 2.0402       | 2.0426       | 2.0186       | 2.0189       |
| Ni2 – O19                       | 2.1064       | 2.0811       | 2.0938       | 2.0861       |
| Ni2 – O18                       | 2.1064       | 2.0980       | 2.0898       | 2.0666       |
| <b><math>\sigma_{JT}</math></b> | <b>0.042</b> | <b>0.031</b> | <b>0.037</b> | <b>0.026</b> |
| Ni3 – O9                        | 2.0089       | 1.9883       | 2.0069       | 2.0057       |

|                                 |              |              |              |              |
|---------------------------------|--------------|--------------|--------------|--------------|
| Ni3 – O12                       | 2.0089       | 2.0075       | 2.0149       | 1.9946       |
| Ni3 – O17                       | 2.0402       | 2.0171       | 2.0186       | 2.0252       |
| Ni3 – O20                       | 2.0402       | 2.0485       | 2.0503       | 2.0252       |
| Ni3 – O22                       | 2.1064       | 2.0971       | 2.0898       | 2.1060       |
| Ni3 – O23                       | 2.1064       | 2.1233       | 2.0938       | 2.0859       |
| <b><math>\sigma_{JT}</math></b> | <b>0.042</b> | <b>0.051</b> | <b>0.037</b> | <b>0.044</b> |
| Ni4 – O10                       | 2.0089       | 2.0074       | 2.0143       | 1.9942       |
| Ni4 – O11                       | 2.0089       | 1.9883       | 2.0063       | 2.0061       |
| Ni4 – O18                       | 2.0402       | 2.0483       | 2.0504       | 2.0247       |
| Ni4 – O19                       | 2.0402       | 2.0171       | 2.0187       | 2.0257       |
| Ni4 – O21                       | 2.1064       | 2.1234       | 2.0942       | 2.0859       |
| Ni4 – O24                       | 2.1064       | 2.0971       | 2.0908       | 2.1062       |
| <b><math>\sigma_{JT}</math></b> | <b>0.042</b> | <b>0.051</b> | <b>0.037</b> | <b>0.044</b> |
| W/Mo5 – O17                     | 1.7458       | 1.8108       | 1.8019       | 1.8023       |
| W/Mo5 – O19                     | 1.7458       | 1.8109       | 1.8020       | 1.8017       |
| W/Mo5 – O11                     | 1.8349       | 1.8751       | 1.8951       | 1.8950       |
| W/Mo5 – O9                      | 1.8349       | 1.8752       | 1.8950       | 1.8973       |
| W/Mo5 – O13                     | 2.3231       | 2.2143       | 2.1924       | 2.1891       |
| W/Mo5 – O15                     | 2.3231       | 2.2143       | 2.1924       | 2.1937       |
| <b><math>\sigma_{JT}</math></b> | <b>0.287</b> | <b>0.199</b> | <b>0.180</b> | <b>0.179</b> |
| W/Mo6 – O18                     | 1.7458       | 1.7456       | 1.7460       | 1.8113       |
| W/Mo6 – O20                     | 1.7458       | 1.7454       | 1.7456       | 1.8106       |
| W/Mo6 – O10                     | 1.8349       | 1.8366       | 1.8400       | 1.8802       |
| W/Mo6 – O12                     | 1.8349       | 1.8366       | 1.8395       | 1.8783       |
| W/Mo6 – O14                     | 2.3231       | 2.3189       | 2.3098       | 2.2019       |
| W/Mo6 – O16                     | 2.3231       | 2.3191       | 2.3107       | 2.208        |
| <b><math>\sigma_{JT}</math></b> | <b>0.287</b> | <b>0.283</b> | <b>0.277</b> | <b>0.192</b> |
| W/Mo7 – O21                     | 1.7458       | 1.7334       | 1.8019       | 1.8023       |
| W/Mo7 – O23                     | 1.7458       | 1.7334       | 1.8020       | 1.8019       |
| W/Mo7 – O13                     | 1.8349       | 1.8612       | 1.8950       | 1.8993       |
| W/Mo7 – O15                     | 1.8349       | 1.8613       | 1.8951       | 1.8970       |
| W/Mo7 – O9                      | 2.3231       | 2.2881       | 2.1924       | 2.1821       |
| W/Mo7 – O11                     | 2.3231       | 2.2883       | 2.1924       | 2.1872       |
| <b><math>\sigma_{JT}</math></b> | <b>0.287</b> | <b>0.257</b> | <b>0.180</b> | <b>0.174</b> |
| W8 – O22                        | 1.7458       | 1.7462       | 1.7460       | 1.7337       |
| W8 – O24                        | 1.7458       | 1.7461       | 1.7456       | 1.7330       |
| W8 – O14                        | 1.8349       | 1.8385       | 1.8400       | 1.8676       |
| W8 – O16                        | 1.8349       | 1.8382       | 1.8395       | 1.8642       |
| W8 – O10                        | 2.3231       | 2.3117       | 2.3098       | 2.2758       |
| W8 – O12                        | 2.3231       | 2.3118       | 2.3107       | 2.2813       |

|               |       |       |       |       |
|---------------|-------|-------|-------|-------|
| $\sigma_{JT}$ | 0.287 | 0.283 | 0.277 | 0.250 |
|---------------|-------|-------|-------|-------|

### Density of States – DOS

An analysis of the partial DOS reveals that the orbitals at the VB and CB are non-degenerated with different contribution of the d orbitals of the transition metals and p orbitals from O atoms. For the NW model (**Figure SI-2**), the VB is formed by a homogeneous contribution of Ni  $3d$  orbitals, and O  $2p$  orbitals. However, the CB is mainly formed by Ni  $3d_{xz} + 3d_{yz} + 3d_{xy}$  orbitals and mainly by the W  $e_g (5d_{z^2} + 5d_{x^2-y^2})$  orbitals. At the top of the VB in the  $\alpha$  channel at NW involves the hybridization of Ni  $3d_{xz} + 3d_{xy}$  orbitals and O  $2p_z$  orbitals, whereas the bottom of the CB is formed mainly by empty W  $5d_{z^2} + 5d_{xz} + 5d_{x^2-y^2}$  orbitals. For the  $\beta$  channel, the VB is formed by Ni  $3d_{x^2-y^2}$  orbitals hybridized with O  $2p_z$  orbitals, while the CB is composed of the hybridization between the W  $5d_{z^2} + 5d_{xz}$  orbitals with Ni  $3d_{xz} + 3d_{xy}$  orbitals.

For the NM in **Figure SI-3**, the VB is formed also by contribution of Ni  $3d$  orbitals, and O  $2p$  orbitals, while the CB is mainly formed by Ni  $3d_{xy}$  orbitals and mainly by a homogeneous contribution of the W  $e_g (5d_{z^2} + 5d_{x^2-y^2})$  and W  $5d_{xz} + 5d_{yz}$  orbitals. The top of the VB is composed by only Ni  $3d_{xy}$  and  $3d_{x^2-y^2}$  orbitals in the  $\alpha$  and  $\beta$  channels, respectively. Concerning the bottom of the CB, the  $\alpha$  channel is composed by empty Mo  $4d_{z^2} + 4d_{xz} + 4d_{x^2-y^2}$  orbitals, while at the  $\beta$  channel, there is a hybridization between the Mo  $5d_{z^2} + 5d_{xz}$  orbitals with Ni  $3d_{xz}$  orbitals.

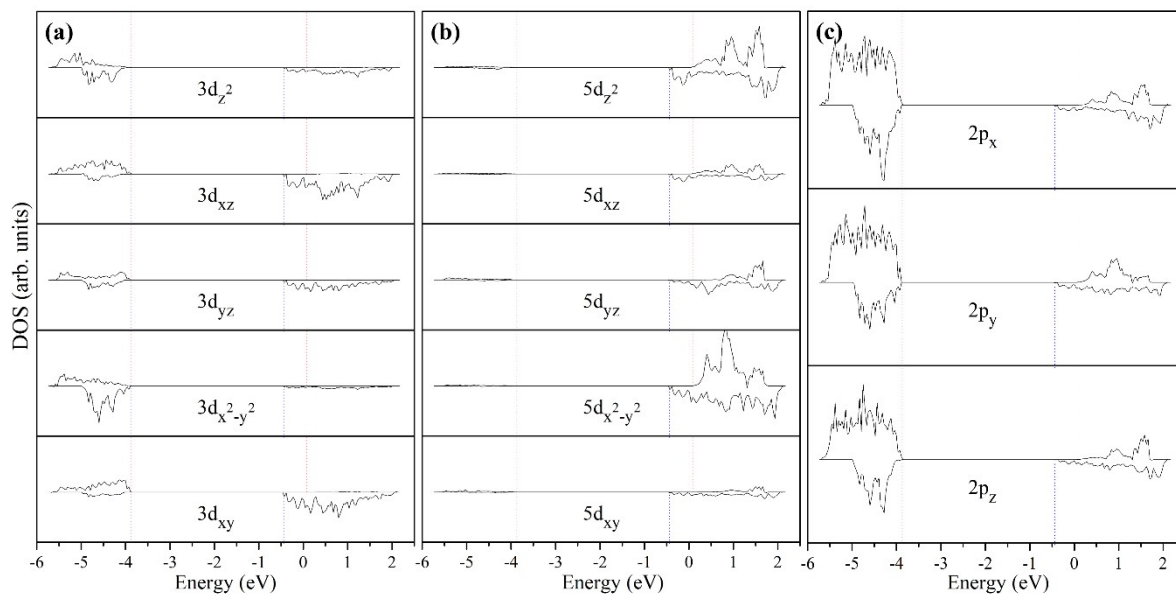

**Figure SI-2.** Partial DOS projected on (a) Ni, (b) W, and (c) O orbitals at the pure NW.

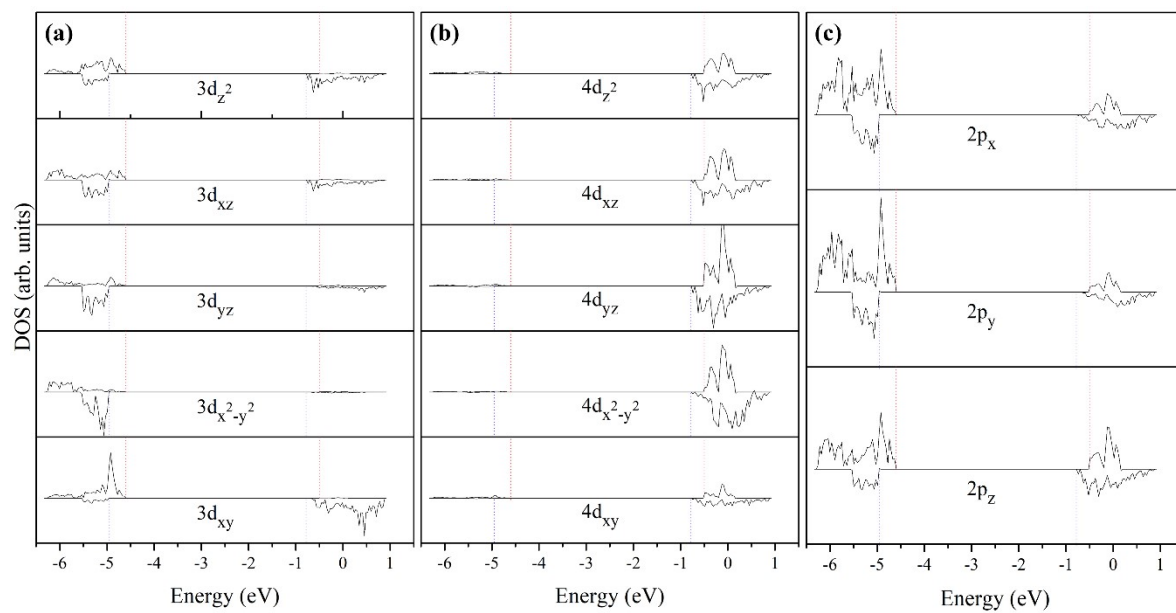

**Figure SI-3.** Partial DOS projected on (a) Ni, (b) Mo, and (c) O orbitals at the pure NM.

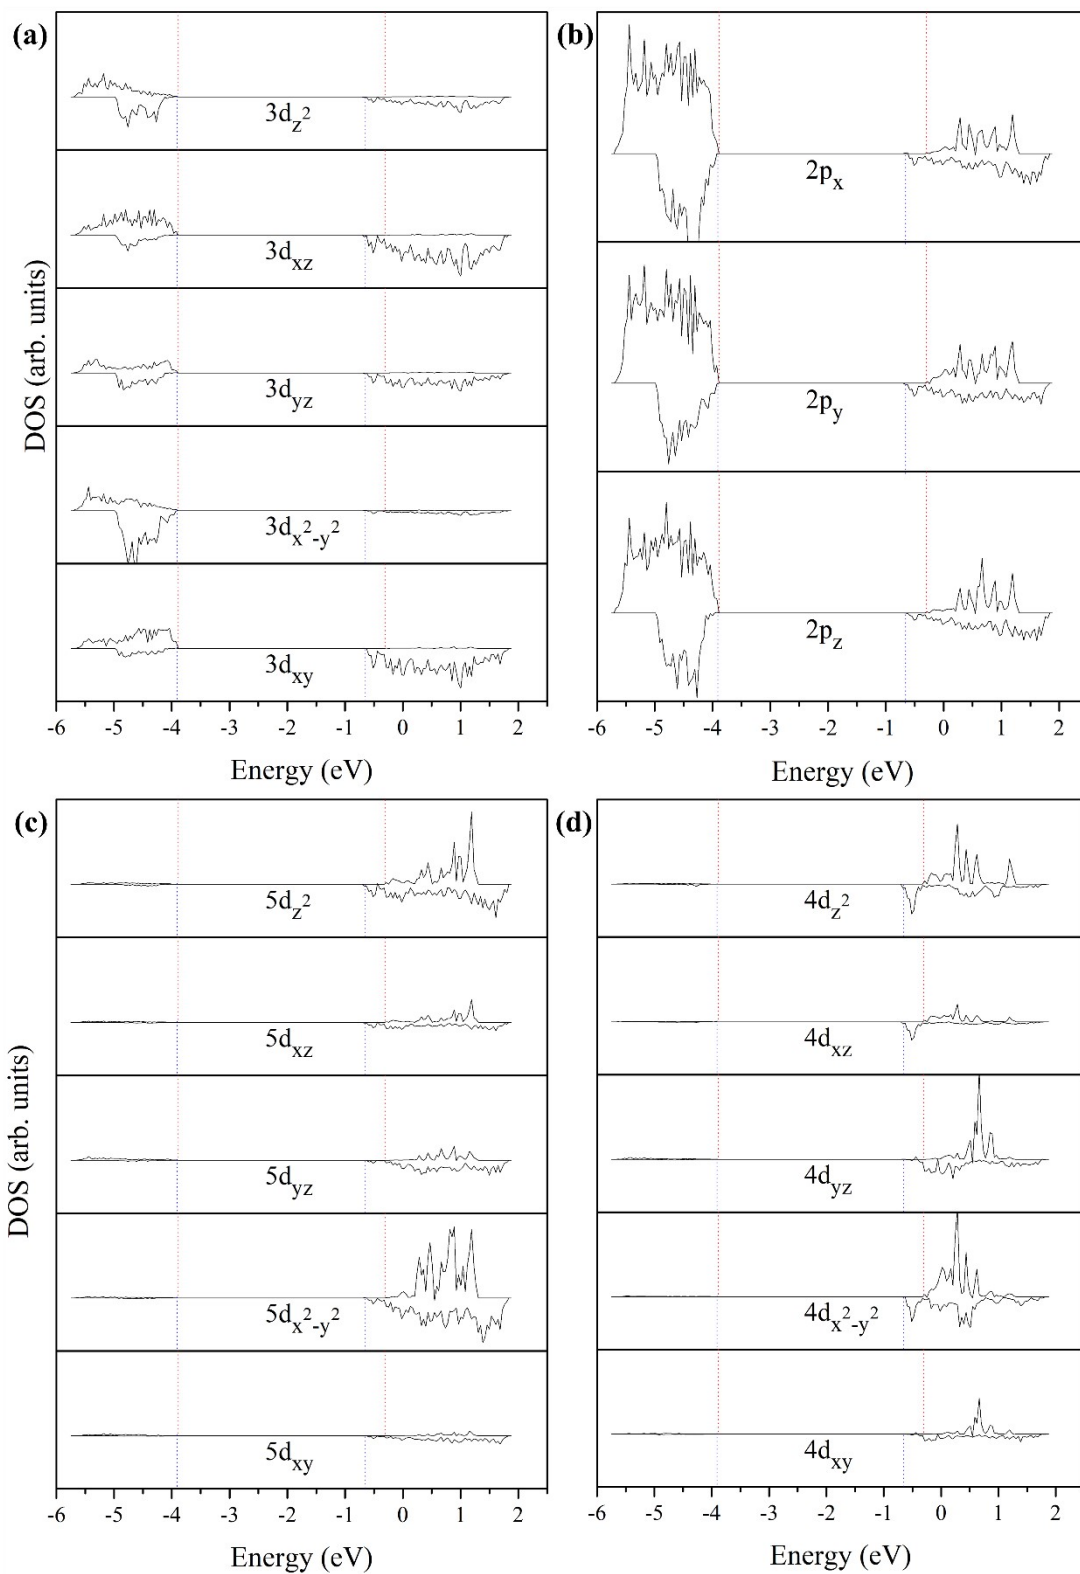

**Figure SI-4.** Partial DOS projected on (a) Ni, (b) O, (c) W, and (d) Mo orbitals at the NW75 solid solutions.

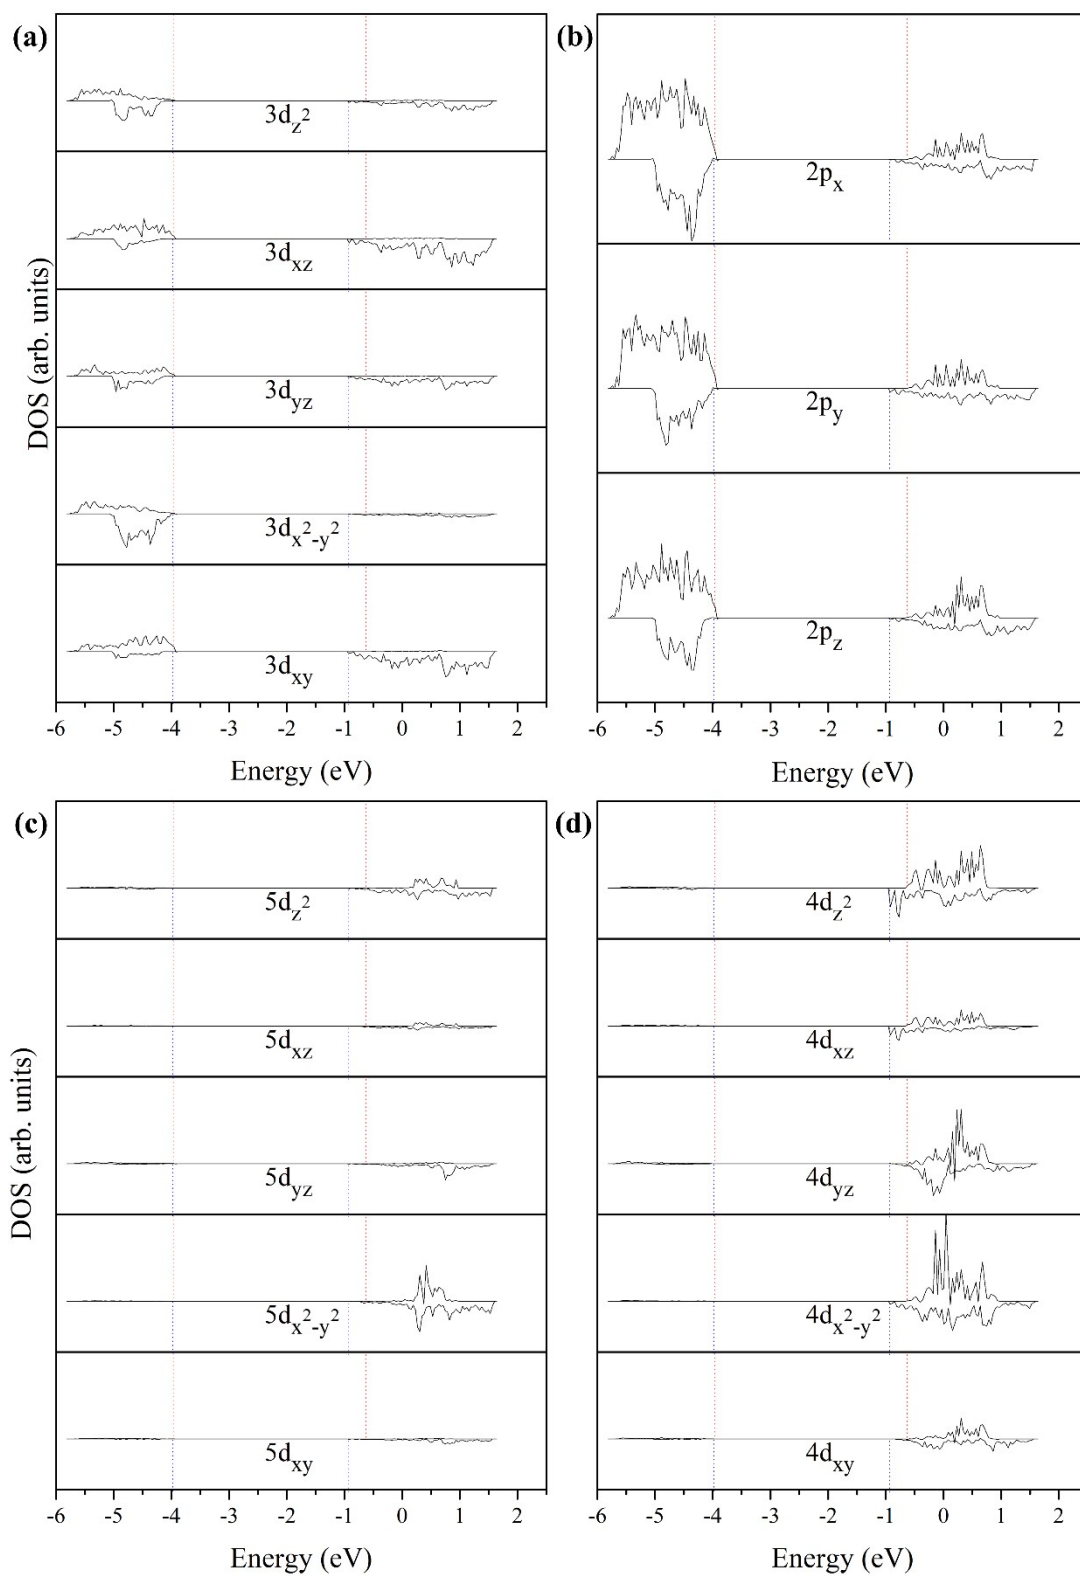

**Figure SI-5.** Partial DOS projected on (a) Ni, (b) O, (c) W, and (d) Mo orbitals at the NW50 solid solutions.

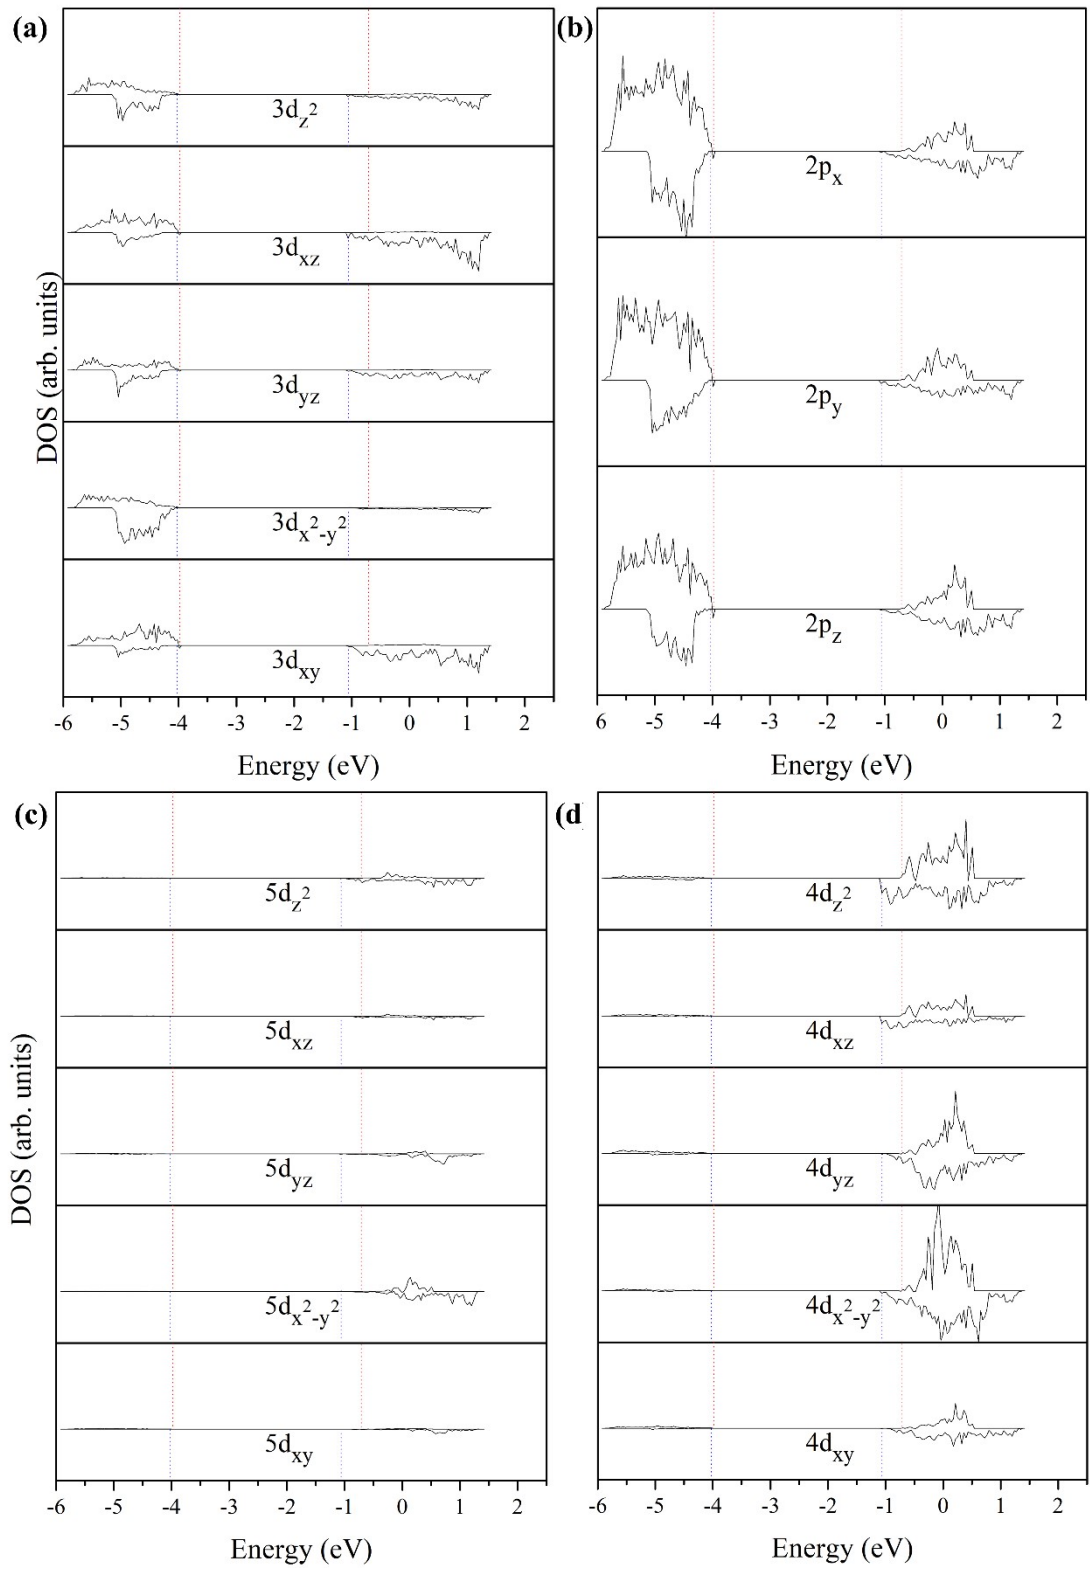

Figure SI-6. Partial DOS projected on (a) Ni, (b) O, (c) W, and (d) Mo orbitals at the NW25 solid solutions.
